# Supplementary material
Source: Research Square preprint supplement (doi:10.21203/rs.3.rs-9245607/v1)
Supplement: Supplementary file 1 [file cf03ea589e092be268f99faa.docx]

**Appendix A: Survey Questionnaire**

*Seeing Green: How Visual Digital Supply Chains Enable Sustainable Business Model Innovation in Manufacturing*

**Section 1: Introduction and Informed Consent**

Dear Participant,

Thank you for taking the time to participate in this academic research survey. The purpose of this study is to investigate the adoption of visual digital supply chains and their influence on green business model innovation in Chinese manufacturing firms. This survey is conducted exclusively for academic research purposes.

Your participation is entirely voluntary, and you may withdraw at any point without any consequence. All responses are strictly anonymous; no personally identifiable information will be collected. Your answers will be used solely for the purposes of this academic study and will not be publicly disclosed or shared with any third party. The survey takes approximately 10–15 minutes to complete.

By proceeding with this survey, you indicate that you have read and understood the above information and that you voluntarily consent to participate in this study.

**Section 2: Screening Item**

Q0: Are you familiar with the concepts of visual digital supply chains and/or green business model innovation in the context of your firm’s operations?

○ Yes (proceed to Section 3)

○ No (survey terminates — thank you for your time)

**Section 3: Firm Demographic Information**

**Q1: What is the age of your firm?**

○ 5 years or less

○ 6–15 years

○ 16 years or more

**Q2: What is the size of your firm (number of employees)?**

○ 50 employees or fewer

○ 51–499 employees

○ 500 employees or more

**Q3: What is the primary business type of your firm?**

○ B2C (Business-to-Consumer)

○ B2B (Business-to-Business)

○ Hybrid (both B2C and B2B)

**Q4: What is the ownership structure of your firm?**

○ State-owned

○ Private

○ Foreign

○ Others

**Section 4: Construct Measurement Items**

*Please indicate your level of agreement with each of the following statements on a 7-point scale, where 1 = Strongly Disagree and 7 = Strongly Agree (unless otherwise specified).*

**WAVE 1**

**Part A: Technology (TE)**

*Adapted from Zou et al. (2025)*

TE_1: Our firm has the technical capabilities required to implement a visual digital supply chain.

1 – Strongly Disagree | 2 | 3 | 4 | 5 | 6 | 7 – Strongly Agree

TE_2: Our firm already has the infrastructure required to implement a visual digital supply chain.

1 – Strongly Disagree | 2 | 3 | 4 | 5 | 6 | 7 – Strongly Agree

TE_3: Our firm’s technological systems are compatible with the systems of the visual digital supply chain.

1 – Strongly Disagree | 2 | 3 | 4 | 5 | 6 | 7 – Strongly Agree

TE_4: Our firm already has the technological resources needed to use a visual digital supply chain.

1 – Strongly Disagree | 2 | 3 | 4 | 5 | 6 | 7 – Strongly Agree

**Part B: Organization (OR)**

*Adapted from Wang & Zhang (2024)*

OR_1: Our organizational structure adapts to the implementation of the visual digital supply chain.

1 – Strongly Disagree | 2 | 3 | 4 | 5 | 6 | 7 – Strongly Agree

OR_2: Our organization has sufficient resources to support the application of the visual digital supply chain.

1 – Strongly Disagree | 2 | 3 | 4 | 5 | 6 | 7 – Strongly Agree

OR_3: Our organizational culture supports the innovation and transformation of the visual digital supply chain.

1 – Strongly Disagree | 2 | 3 | 4 | 5 | 6 | 7 – Strongly Agree

OR_4: Our organization shows obvious leadership and support for the adoption of the visual digital supply chain.

1 – Strongly Disagree | 2 | 3 | 4 | 5 | 6 | 7 – Strongly Agree

**Part C: Environment (EN)**

*Adapted from Kalaitzi & Tsolakis (2022)*

EN_1: Our business environment is conducive to the adoption of visual digital supply chain.

1 – Strongly Disagree | 2 | 3 | 4 | 5 | 6 | 7 – Strongly Agree

EN_2: In our industry, competitors adopting visual digital supply chain put pressure on us to do the same.

1 – Strongly Disagree | 2 | 3 | 4 | 5 | 6 | 7 – Strongly Agree

EN_3: The regulatory environment in our industry encourages the adoption of visual digital supply chain.

1 – Strongly Disagree | 2 | 3 | 4 | 5 | 6 | 7 – Strongly Agree

**Part D: Visual Digital Supply Chain Adoption (VDSCA)**

*Adapted from Kalaitzi & Tsolakis (2022)*

VDSCA_1: Our firm recognizes the benefits of adopting a visual digital supply chain.

1 – Strongly Disagree | 2 | 3 | 4 | 5 | 6 | 7 – Strongly Agree

VDSCA_2: We have a strategic plan in place for the adoption of visual digital supply chain.

1 – Strongly Disagree | 2 | 3 | 4 | 5 | 6 | 7 – Strongly Agree

VDSCA_3: We have started allocating resources towards the adoption of a visual digital supply chain.

1 – Strongly Disagree | 2 | 3 | 4 | 5 | 6 | 7 – Strongly Agree

VDSCA_4: Our firm has initiated the process of adopting a visual digital supply chain.

1 – Strongly Disagree | 2 | 3 | 4 | 5 | 6 | 7 – Strongly Agree

VDSCA_5: Our firm has made significant progress towards adopting a visual digital supply chain.

1 – Strongly Disagree | 2 | 3 | 4 | 5 | 6 | 7 – Strongly Agree

**Part E: Potential Absorptive Capacity (PAC)**

*Adapted from Algarni et al. (2023)*

PAC_1: Our firm frequently interacts with clients and competitors to acquire new knowledge.

1 – Strongly Disagree | 2 | 3 | 4 | 5 | 6 | 7 – Strongly Agree

PAC_2: We quickly recognize shifts in our markets such as competition, regulation, and demography.

1 – Strongly Disagree | 2 | 3 | 4 | 5 | 6 | 7 – Strongly Agree

PAC_3: Our firm is able to identify and understand external knowledge.

1 – Strongly Disagree | 2 | 3 | 4 | 5 | 6 | 7 – Strongly Agree

PAC_4: We are able to introduce and organize external knowledge quickly.

1 – Strongly Disagree | 2 | 3 | 4 | 5 | 6 | 7 – Strongly Agree

**Part F: Realized Absorptive Capacity (RAC)**

*Adapted from Algarni et al. (2023)*

RAC_1: We record and store newly acquired knowledge for future reference.

1 – Strongly Disagree | 2 | 3 | 4 | 5 | 6 | 7 – Strongly Agree

RAC_2: We quickly recognize the usefulness of new external knowledge to existing knowledge.

1 – Strongly Disagree | 2 | 3 | 4 | 5 | 6 | 7 – Strongly Agree

RAC_3: Our firm has the ability to transform external knowledge into our own knowledge.

1 – Strongly Disagree | 2 | 3 | 4 | 5 | 6 | 7 – Strongly Agree

RAC_4: Our firm is able to provide new knowledge quickly and efficiently, and apply new knowledge to value creation and related services.

1 – Strongly Disagree | 2 | 3 | 4 | 5 | 6 | 7 – Strongly Agree

**WAVE 2**

**Part G: Digital Strategy (DS)**

*Adapted from Gyamerah et al. (2025)*

DS_1: In my organization, the integration of our business strategy with digital technology promotes strategic alignment with the government and other partners.

1 – Strongly Disagree | 2 | 3 | 4 | 5 | 6 | 7 – Strongly Agree

DS_2: In our organization, we jointly plan how to use digital technology to implement the business strategy.

1 – Strongly Disagree | 2 | 3 | 4 | 5 | 6 | 7 – Strongly Agree

DS_3: Before making strategic decisions, we discuss and take into consideration the impact of digital technology.

1 – Strongly Disagree | 2 | 3 | 4 | 5 | 6 | 7 – Strongly Agree

**Part H: Green Business Model Innovation (GBMI)**

*Adapted from Bashir et al. (2022)*

*Please rate the following items on a 7-point scale, where 1 = Lowest level of innovativeness and 7 = Highest level of innovativeness.*

GBMI_1: On a scale of 1–7, how would you rate your firm’s innovativeness in introducing green products, services, or information, or a new combination of the three?

1 – Lowest | 2 | 3 | 4 | 5 | 6 | 7 – Highest

GBMI_2: On a scale of 1–7, how would you rate your firm’s level of introducing new participants to implement a green business model?

1 – Lowest | 2 | 3 | 4 | 5 | 6 | 7 – Highest

GBMI_3: On a scale of 1–7, how would you rate your firm’s level of providing new transaction incentives to attract participants to the green business model?

1 – Lowest | 2 | 3 | 4 | 5 | 6 | 7 – Highest

GBMI_4: On a scale of 1–7, how would you rate your firm’s level of adopting new transaction methods to connect participants in the green business model?

1 – Lowest | 2 | 3 | 4 | 5 | 6 | 7 – Highest

GBMI_5: On a scale of 1–7, how would you rate your firm’s innovativeness in other aspects of green business model innovation?

1 – Lowest | 2 | 3 | 4 | 5 | 6 | 7 – Highest

**Part I: Perceived Ease of Use (PEU) — Marker Variable**

*Used for common method bias assessment; theoretically unrelated to the focal constructs.*

PEU_1: I find the digital tools used in my daily work to be easy to operate.

1 – Strongly Disagree | 2 | 3 | 4 | 5 | 6 | 7 – Strongly Agree

PEU_2: Learning to use new digital tools in my organization requires little effort.

1 – Strongly Disagree | 2 | 3 | 4 | 5 | 6 | 7 – Strongly Agree

PEU_3: Overall, I believe that digital tools are easy to use.

1 – Strongly Disagree | 2 | 3 | 4 | 5 | 6 | 7 – Strongly Agree

*Thank you for your valuable time and participation. Your responses will make an important contribution to academic research on sustainable manufacturing and digital supply chain innovation.*
